# Supplementary material
Source: MDPI journal article supplement (https://www.mdpi.com/1424-8247/15/5/537)
Supplement: s1 [file s1]

# Supporting Information

## Discovery of nitro-azolo[1,5-*a*]pyrimidines with anti-inflammatory and protective activity against LPS-induced acute lung injury

Alexander Spasov <sup>1</sup>, Vadim Kosolapov <sup>1</sup>, Denis Babkov <sup>1\*</sup>, Vladlen Klochkov <sup>1</sup>, Elena Sokolova <sup>1</sup>, Mikhail Miroshnikov <sup>1</sup>, Alexander Borisov <sup>1</sup>, Yulia Velikorodnaya <sup>1</sup>, Alexey Smirnov <sup>1</sup>, Konstantin Savateev <sup>2</sup>, Victor Fedotov <sup>2</sup>, Svetlana Kotovskaya <sup>2</sup> and Vladimir Rusinov <sup>2</sup>

<sup>1</sup> Department of Pharmacology & Bioinformatics, Scientific Center for Innovative Drugs, Volgograd State Medical University, Volgograd 400131, Russia; [aspasov@mail.ru](mailto:aspasov@mail.ru) (A.S.); [vad-ak@mail.ru](mailto:vad-ak@mail.ru) (V.K.); [klochkovvladlen@gmail.com](mailto:klochkovvladlen@gmail.com) (V.K.); [sokolova210795@gmail.com](mailto:sokolova210795@gmail.com) (E.S.); [mirwaisroman77@gmail.com](mailto:mirwaisroman77@gmail.com) (M.M.); [borissow1978@rambler.ru](mailto:borissow1978@rambler.ru) (A.B.); [alta-u@mail.ru](mailto:alta-u@mail.ru) (Y.V.); [alexeysmirnov.volggmu@gmail.com](mailto:alexeysmirnov.volggmu@gmail.com) (A.S.)

<sup>2</sup> Department of Organic and Biomolecular Chemistry, Ural Federal University Named after the First President of Russia B.N. Yeltsin, Mira Street, 19, Yekaterinburg 620002, Russia; [i-krafttt@yandex.ru](mailto:i-krafttt@yandex.ru) (K.S.); [vicww4@gmail.com](mailto:vicww4@gmail.com) (V.F.); [sk-kotovskaya-665@yandex.ru](mailto:sk-kotovskaya-665@yandex.ru) (S.K.); [v.l.rusinov@urfu.ru](mailto:v.l.rusinov@urfu.ru) (V.R.)

\* Correspondence: [dababkov@volgmed.ru](mailto:dababkov@volgmed.ru); Tel.: +7-9889608025

### Table of contents

|                            |   |
|----------------------------|---|
| Spectra of compounds ..... | 2 |
|----------------------------|---|

**Spectra of compounds**  
***N*-Isopropyl-5-methyl-6-nitrotetrazolo[1,5-*a*]pyrimidin-7-amine (9a)**

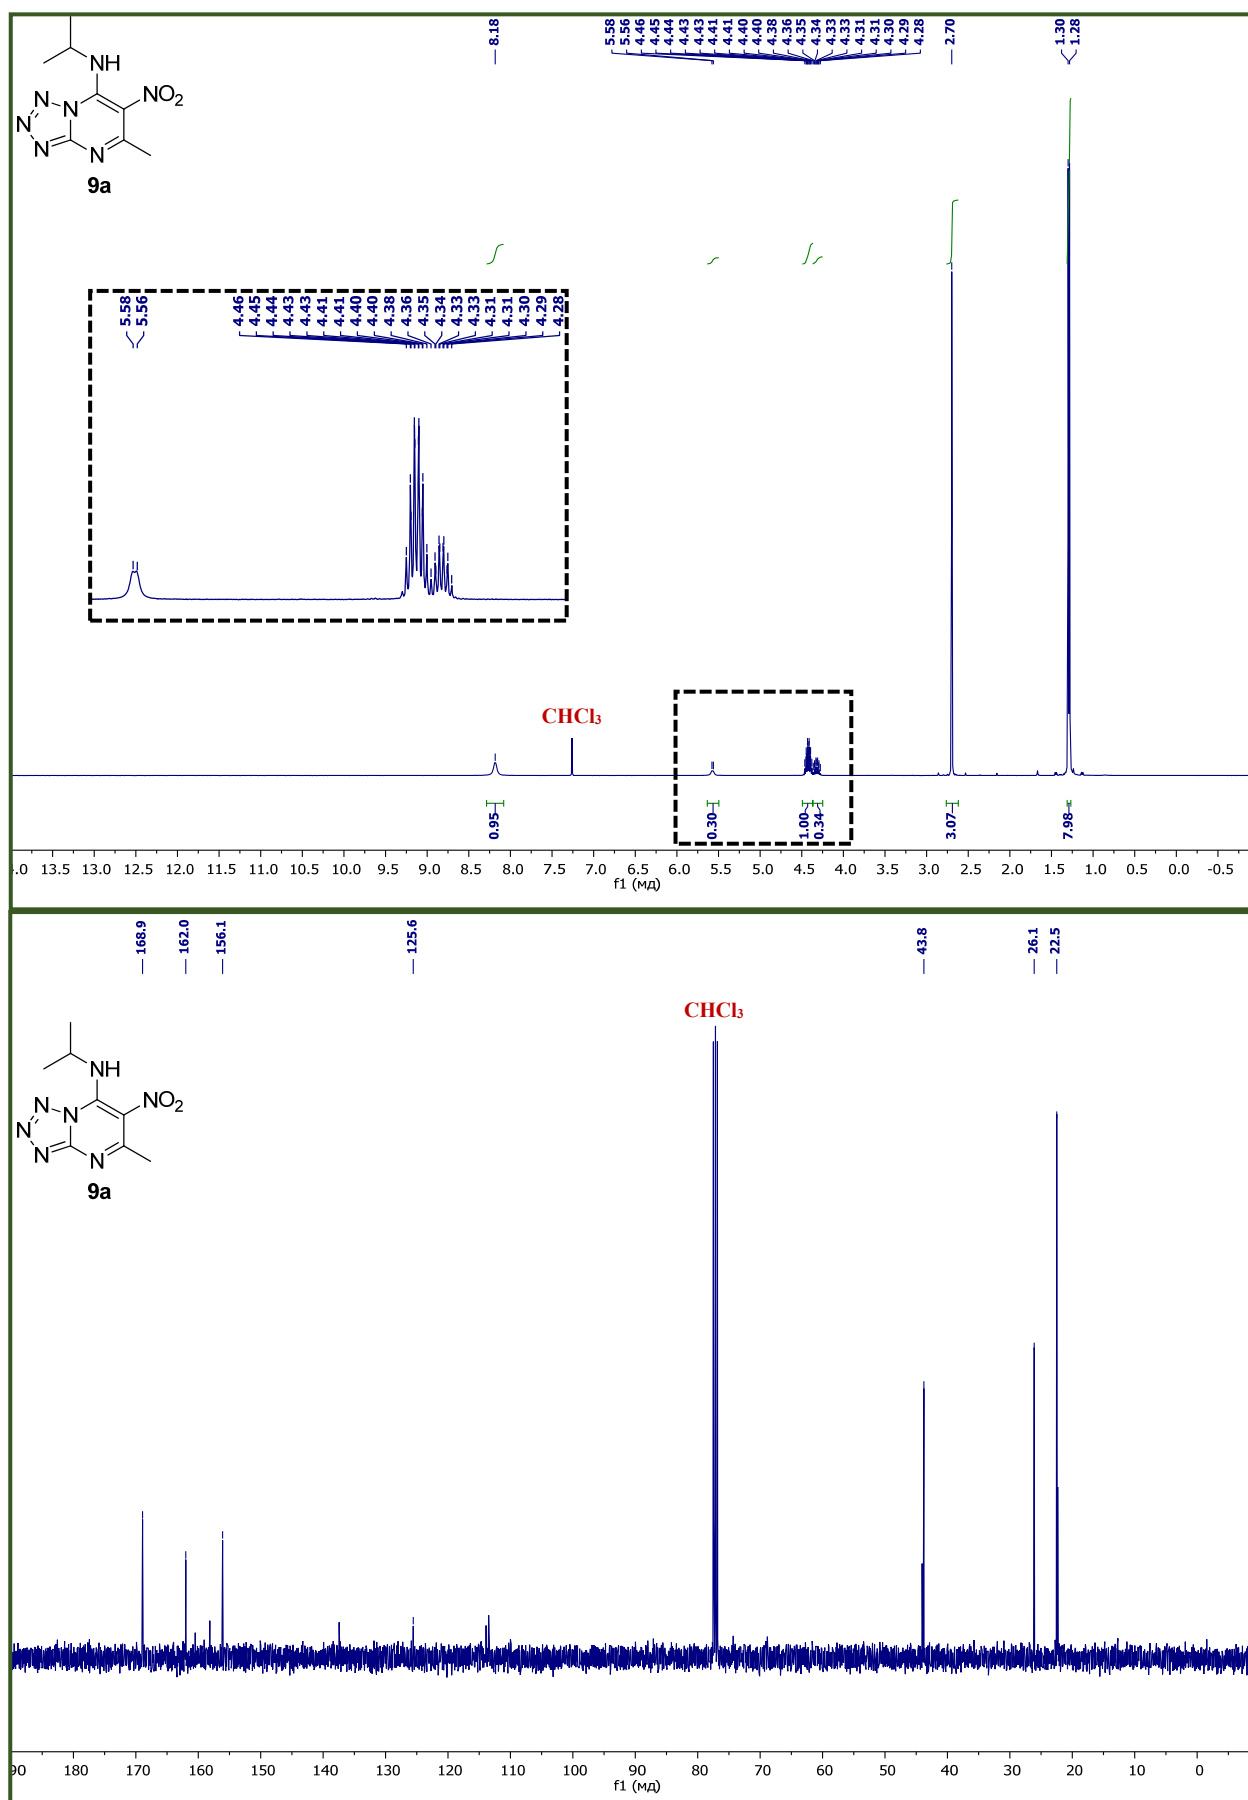

**Figure S1.** <sup>1</sup>H NMR (400 MHz, CDCl<sub>3</sub>) and <sup>13</sup>C NMR (100 MHz, CDCl<sub>3</sub>) spectra of **9a**

***N*-tert-Butyl-5-methyl-6-nitrotetrazolo[1,5-*a*]pyrimidin-7-amine (9b)**

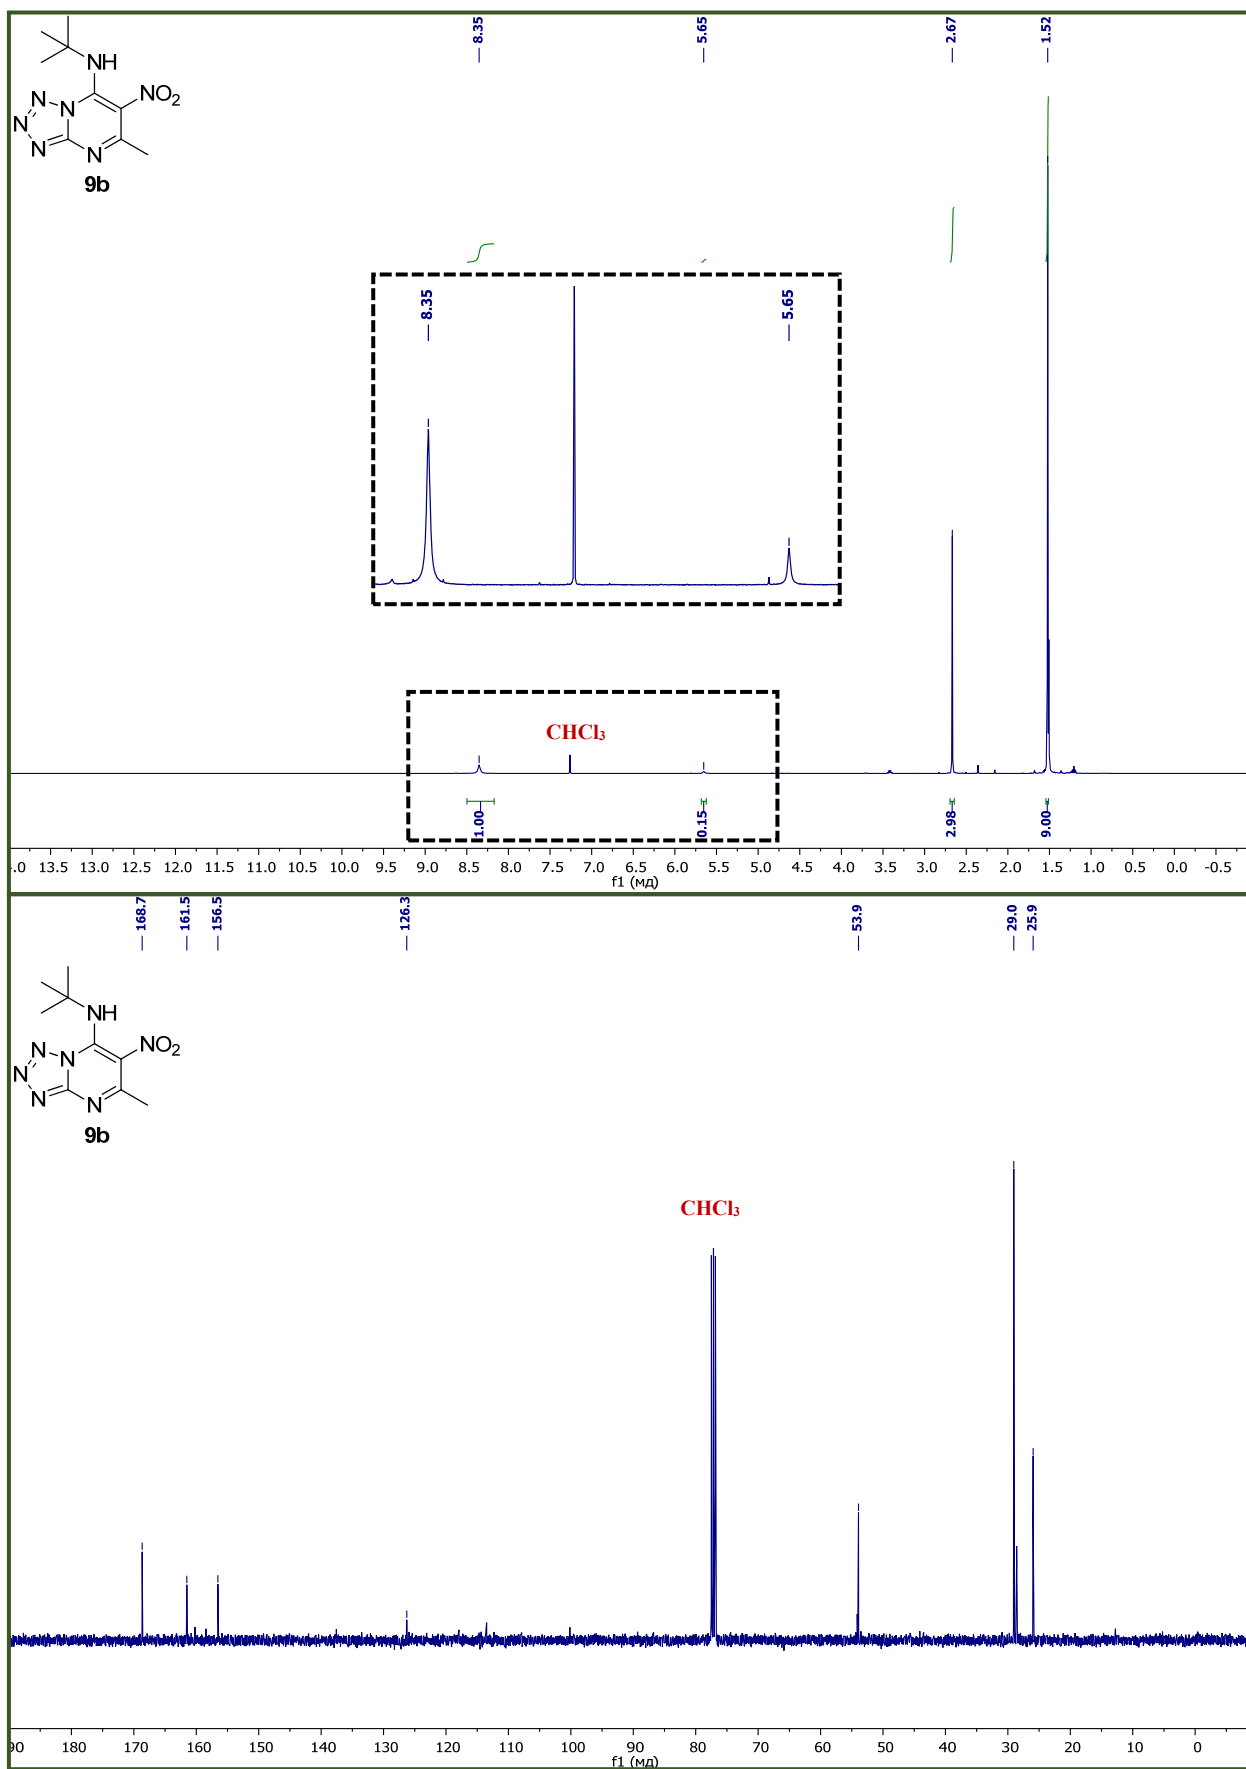

**Figure S2.** <sup>1</sup>H NMR (400 MHz, CDCl<sub>3</sub>) and <sup>13</sup>C NMR (100 MHz, CDCl<sub>3</sub>) spectra of **9b**

2-[(5-Methyl-6-nitrotetrazolo[1,5-*a*]pyrimidin-7-yl)-amino]ethanol (**9c**)

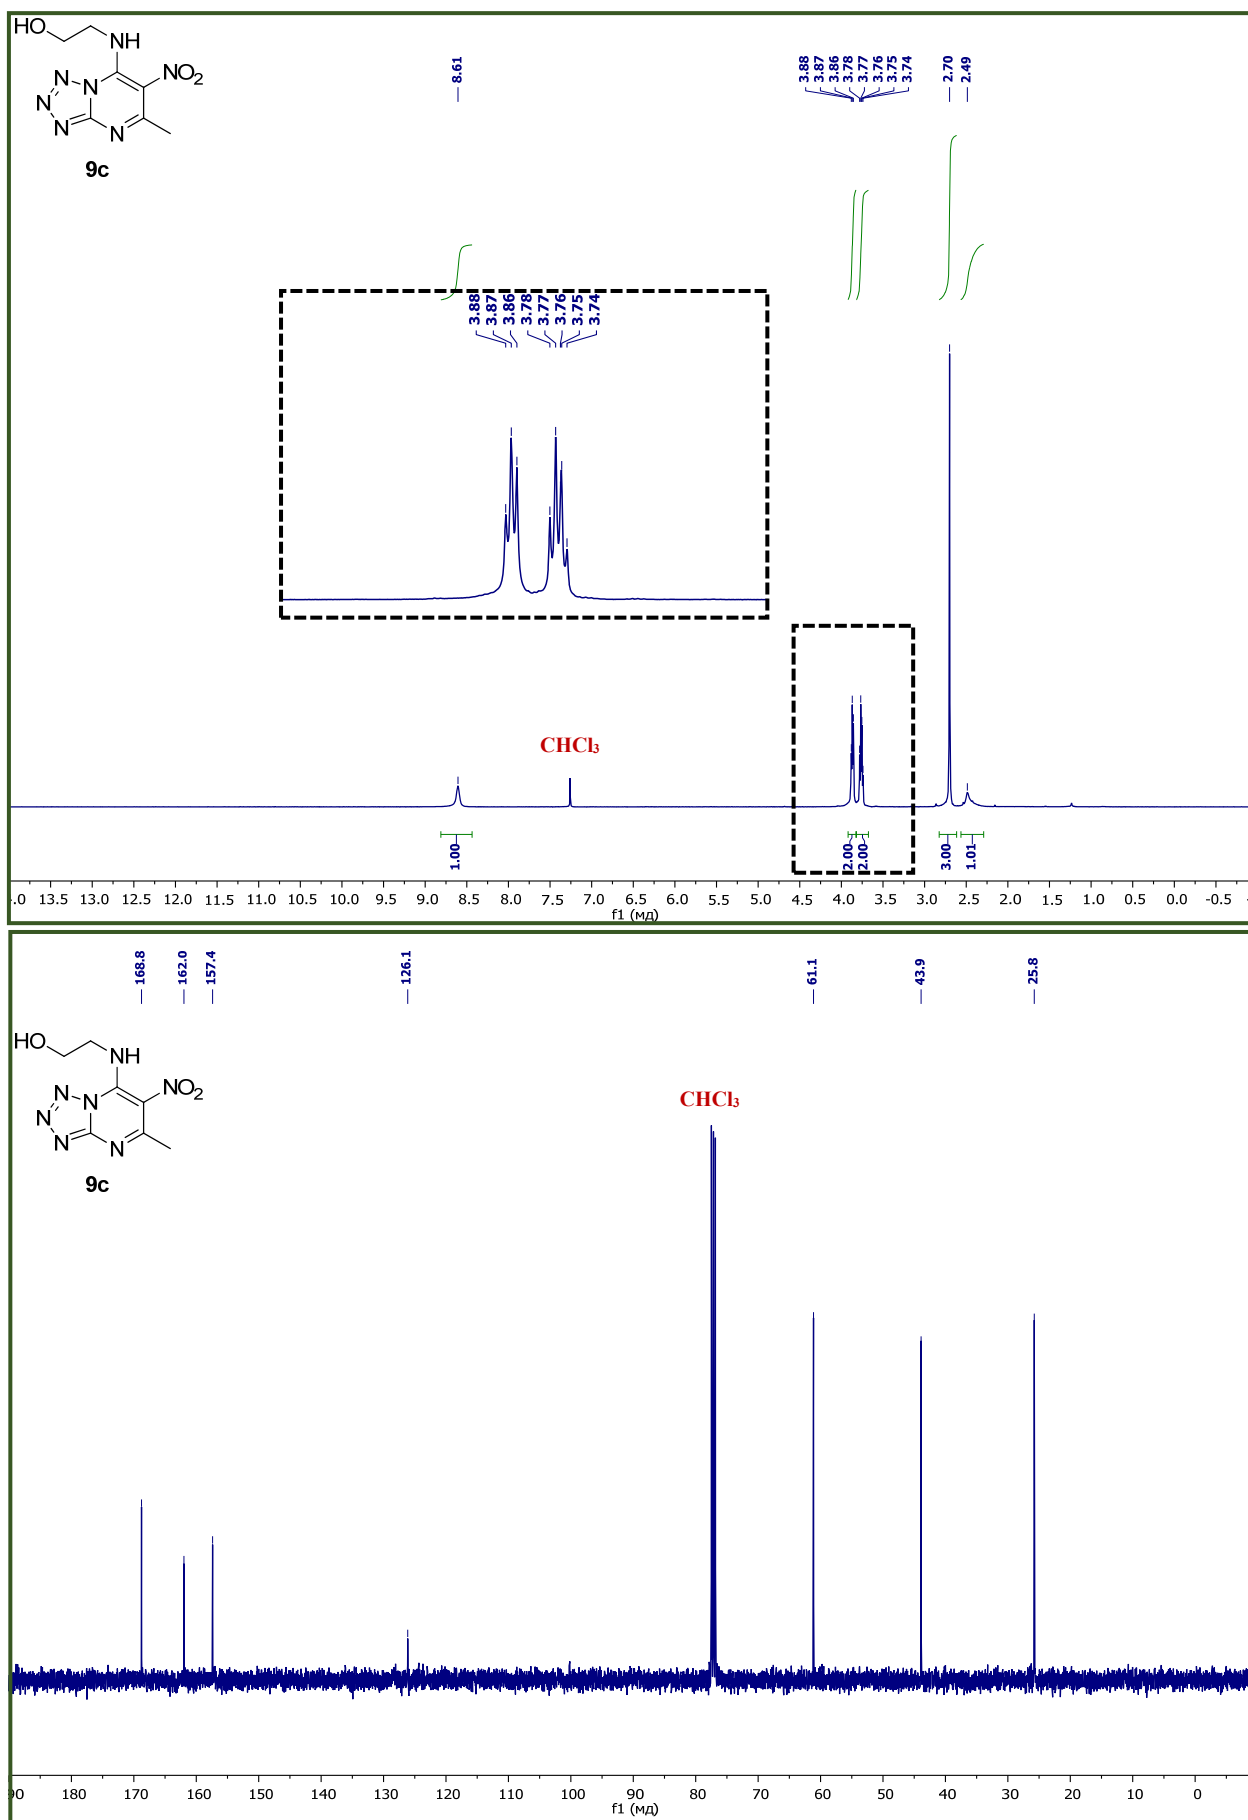

Figure S3. <sup>1</sup>H NMR (400 MHz, CDCl<sub>3</sub>) and <sup>13</sup>C NMR (100 MHz, CDCl<sub>3</sub>) spectra of **9c**

3-[(5-Methyl-6-nitrotetrazolo[1,5-*a*]pyrimidin-7-yl)-amino]propanol (**9d**)

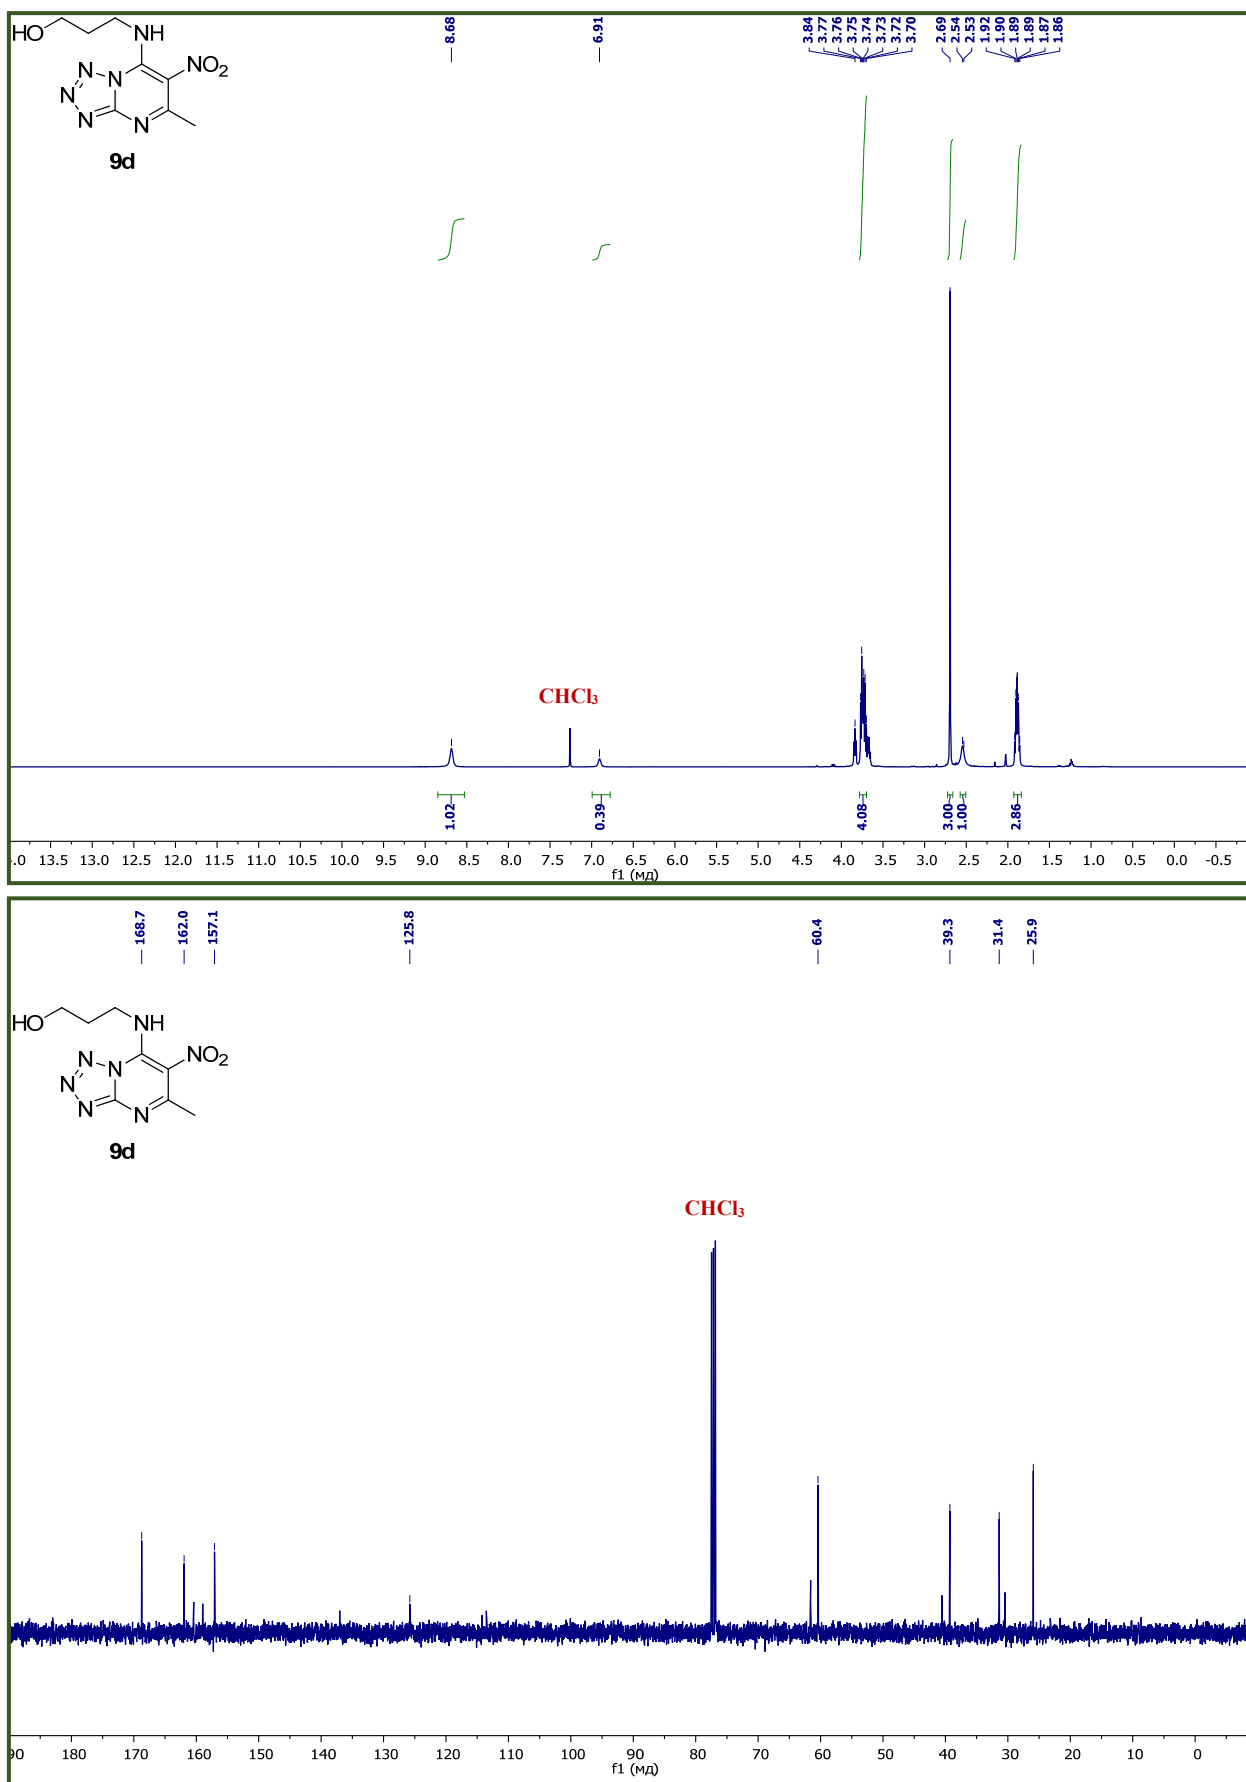

Figure S4. <sup>1</sup>H NMR (400 MHz, CDCl<sub>3</sub>) and <sup>13</sup>C NMR (100 MHz, CDCl<sub>3</sub>) spectra of **9d**

**3-[(5-Methyl-6-nitrotetrazolo[1,5-*a*]pyrimidin-7-yl)-amino]propane-1,2-diol (9e)**

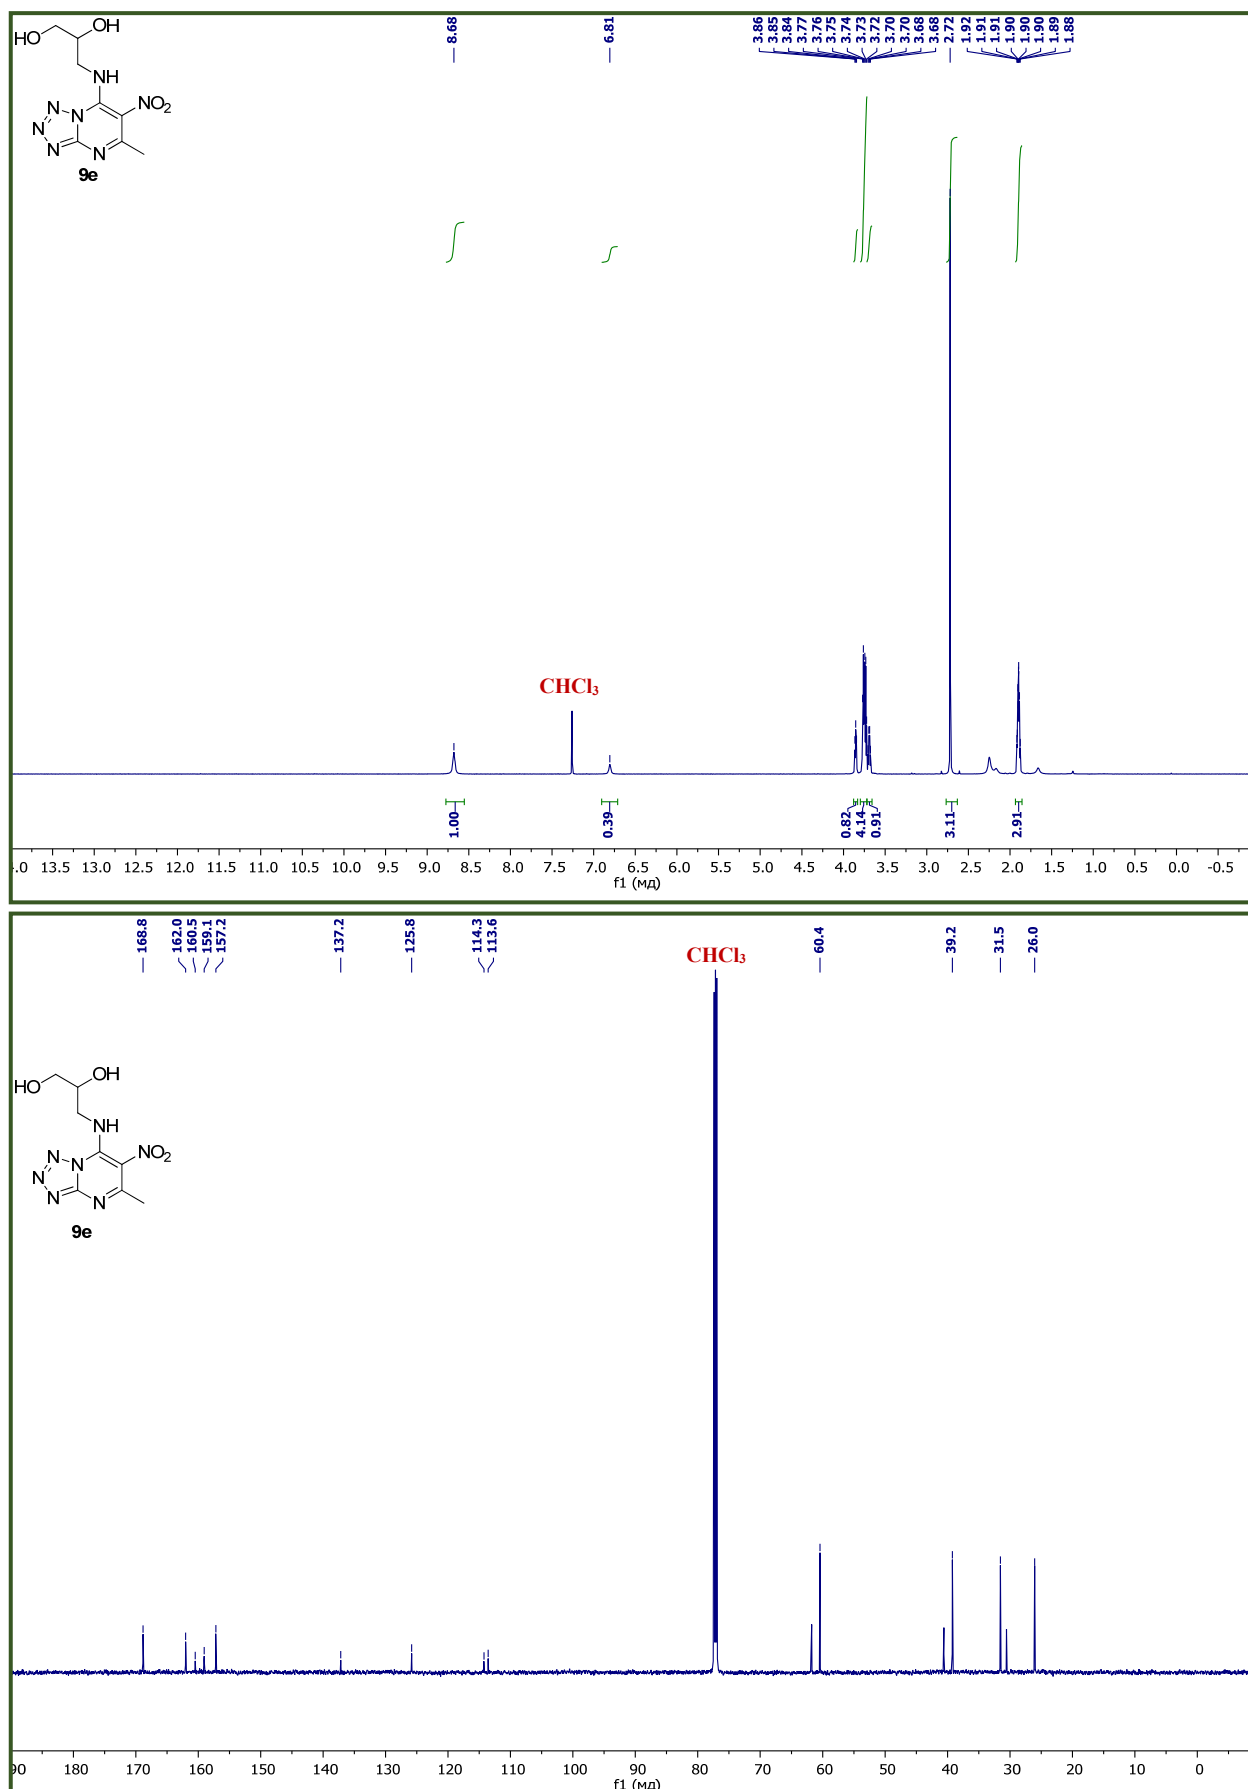

**Figure S5.** <sup>1</sup>H NMR (400 MHz, CDCl<sub>3</sub>) and <sup>13</sup>C NMR (100 MHz, CDCl<sub>3</sub>) spectra of **9e**

N-[2-(4-Chlorophenyl)ethyl]-5-methyl-6-nitrotetrazolo-[1,5-*a*]pyrimidin-7-amine (9f)

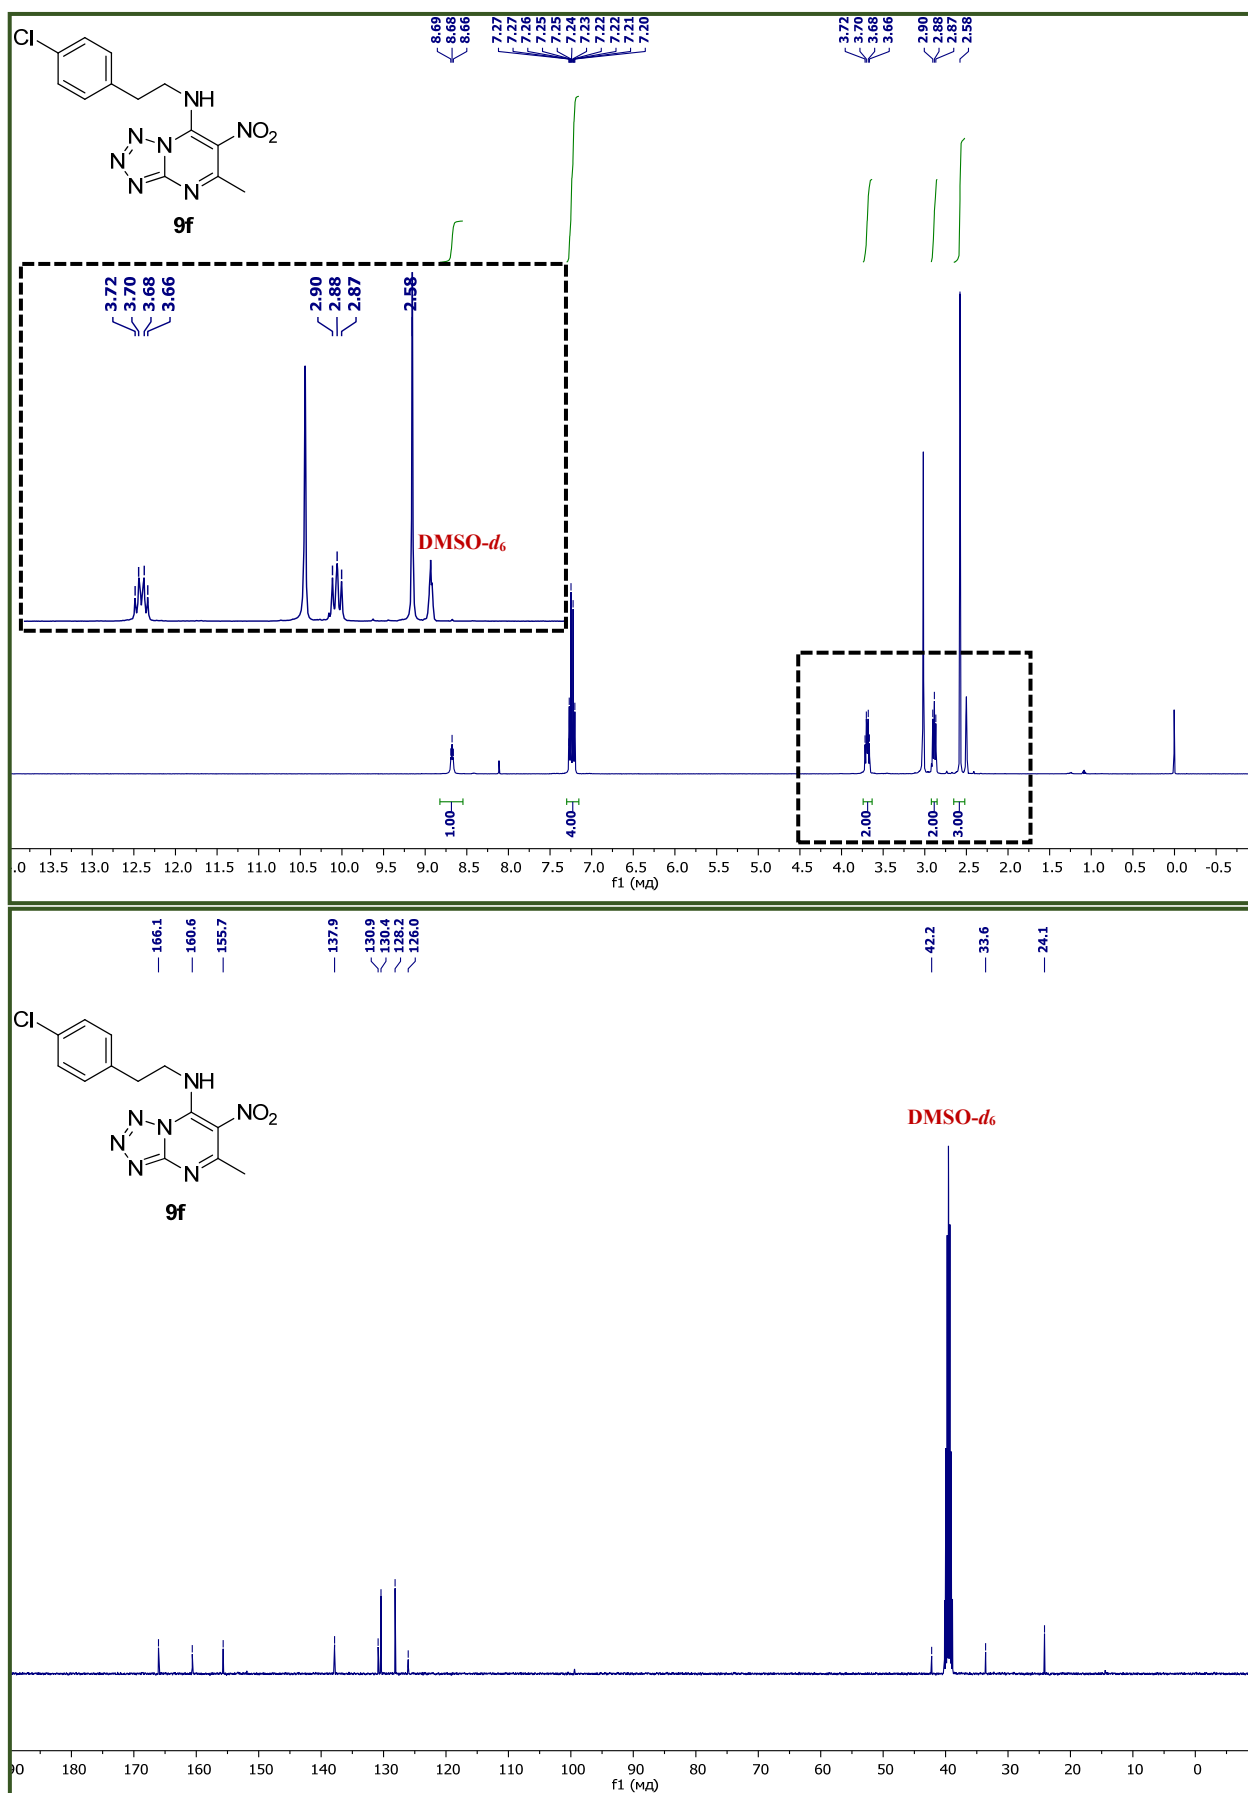

Figure S6. <sup>1</sup>H NMR (400 MHz, DMSO-*d*<sub>6</sub>) and <sup>13</sup>C NMR (100 MHz, DMSO-*d*<sub>6</sub>) spectra of 9f

N-[2-(4-Hydroxyphenyl)ethyl]-5-methyl-6-nitrotetrazolo-[1,5-*a*]pyrimidin-7-amine (9g)

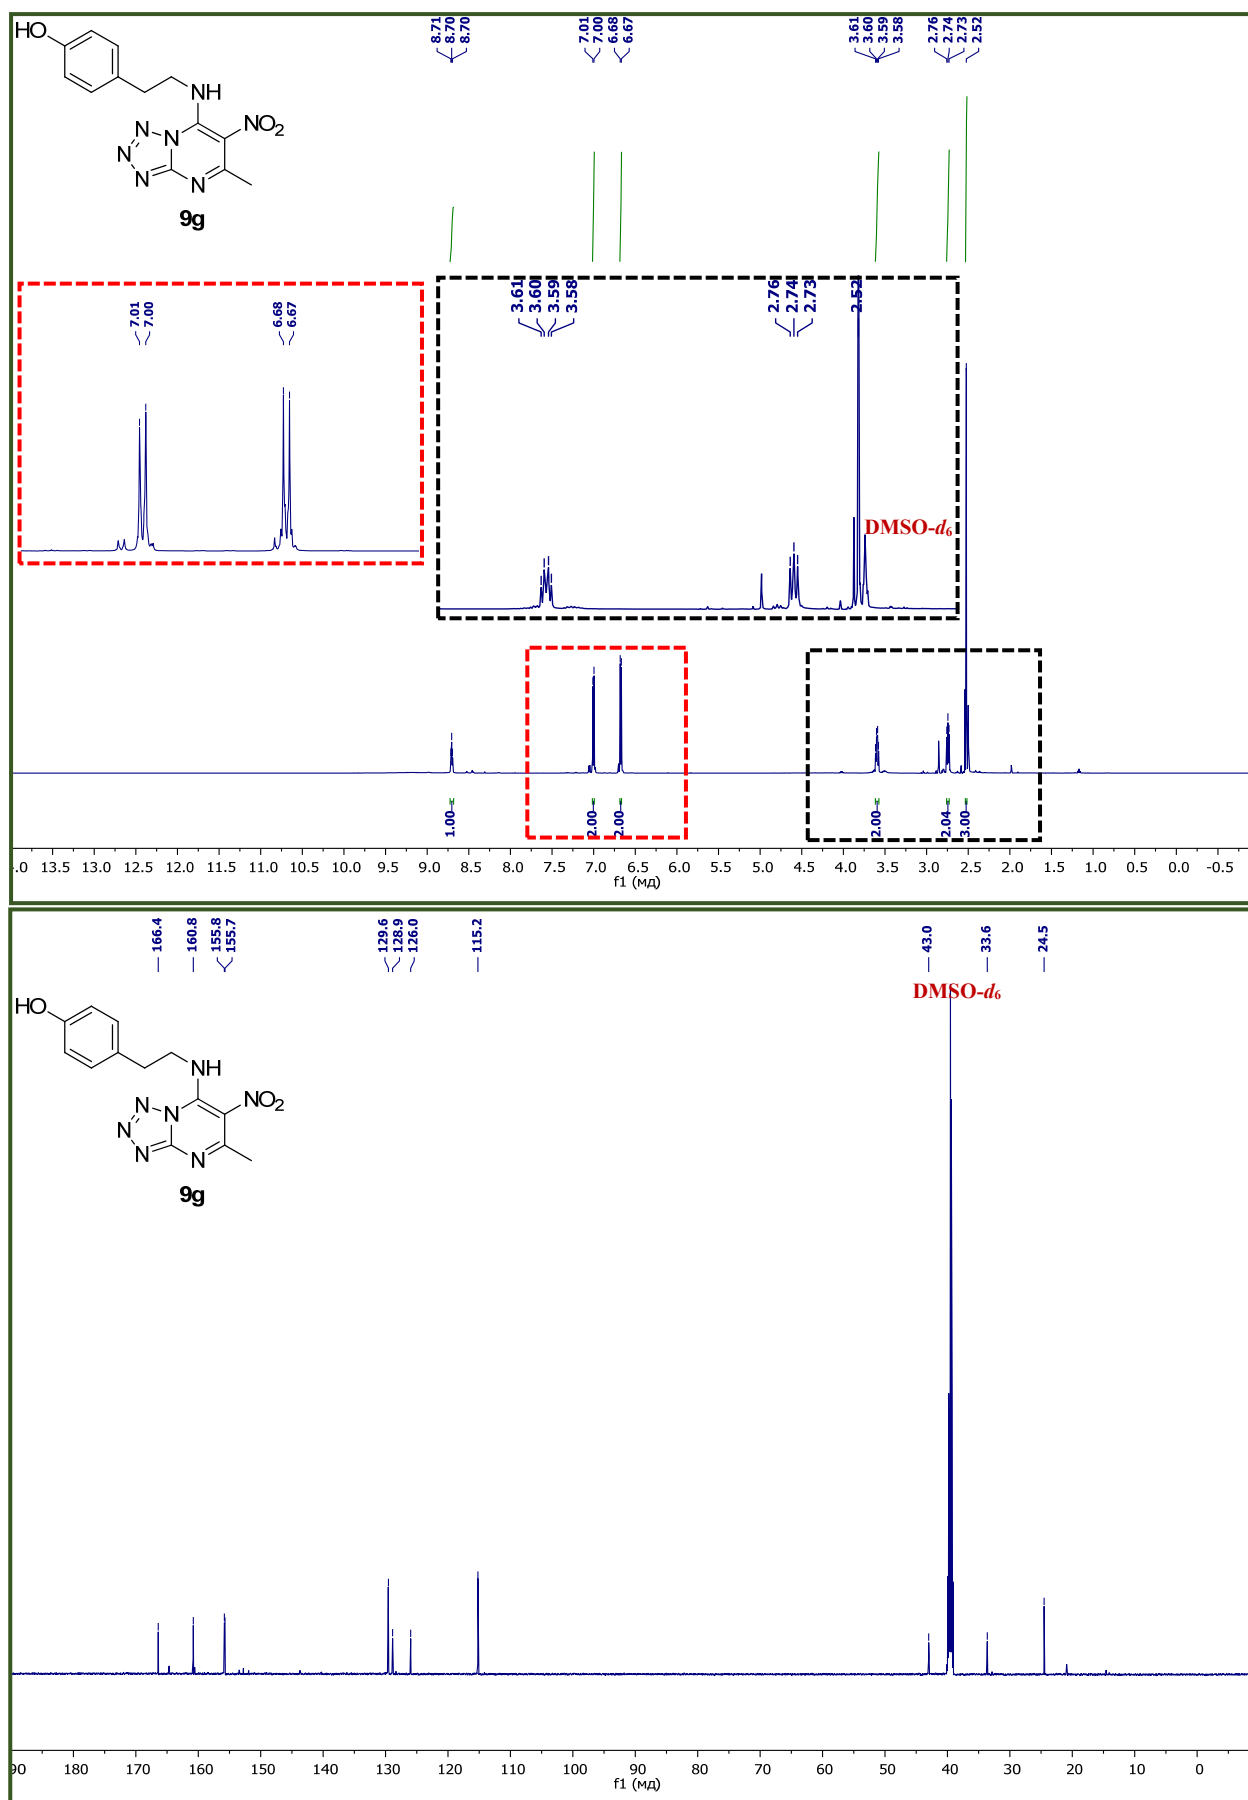

Figure S7. <sup>1</sup>H NMR (400 MHz, DMSO-*d*<sub>6</sub>) and <sup>13</sup>C NMR (100 MHz, DMSO-*d*<sub>6</sub>) spectra of 9f



**N-(4-Chlorophenethyl)-6-nitro-2-(prop-2-yn-1-ylsulfanyl)[1,2,4]triazolo[1,5-a]pyrimidin-7-amine (10f)**

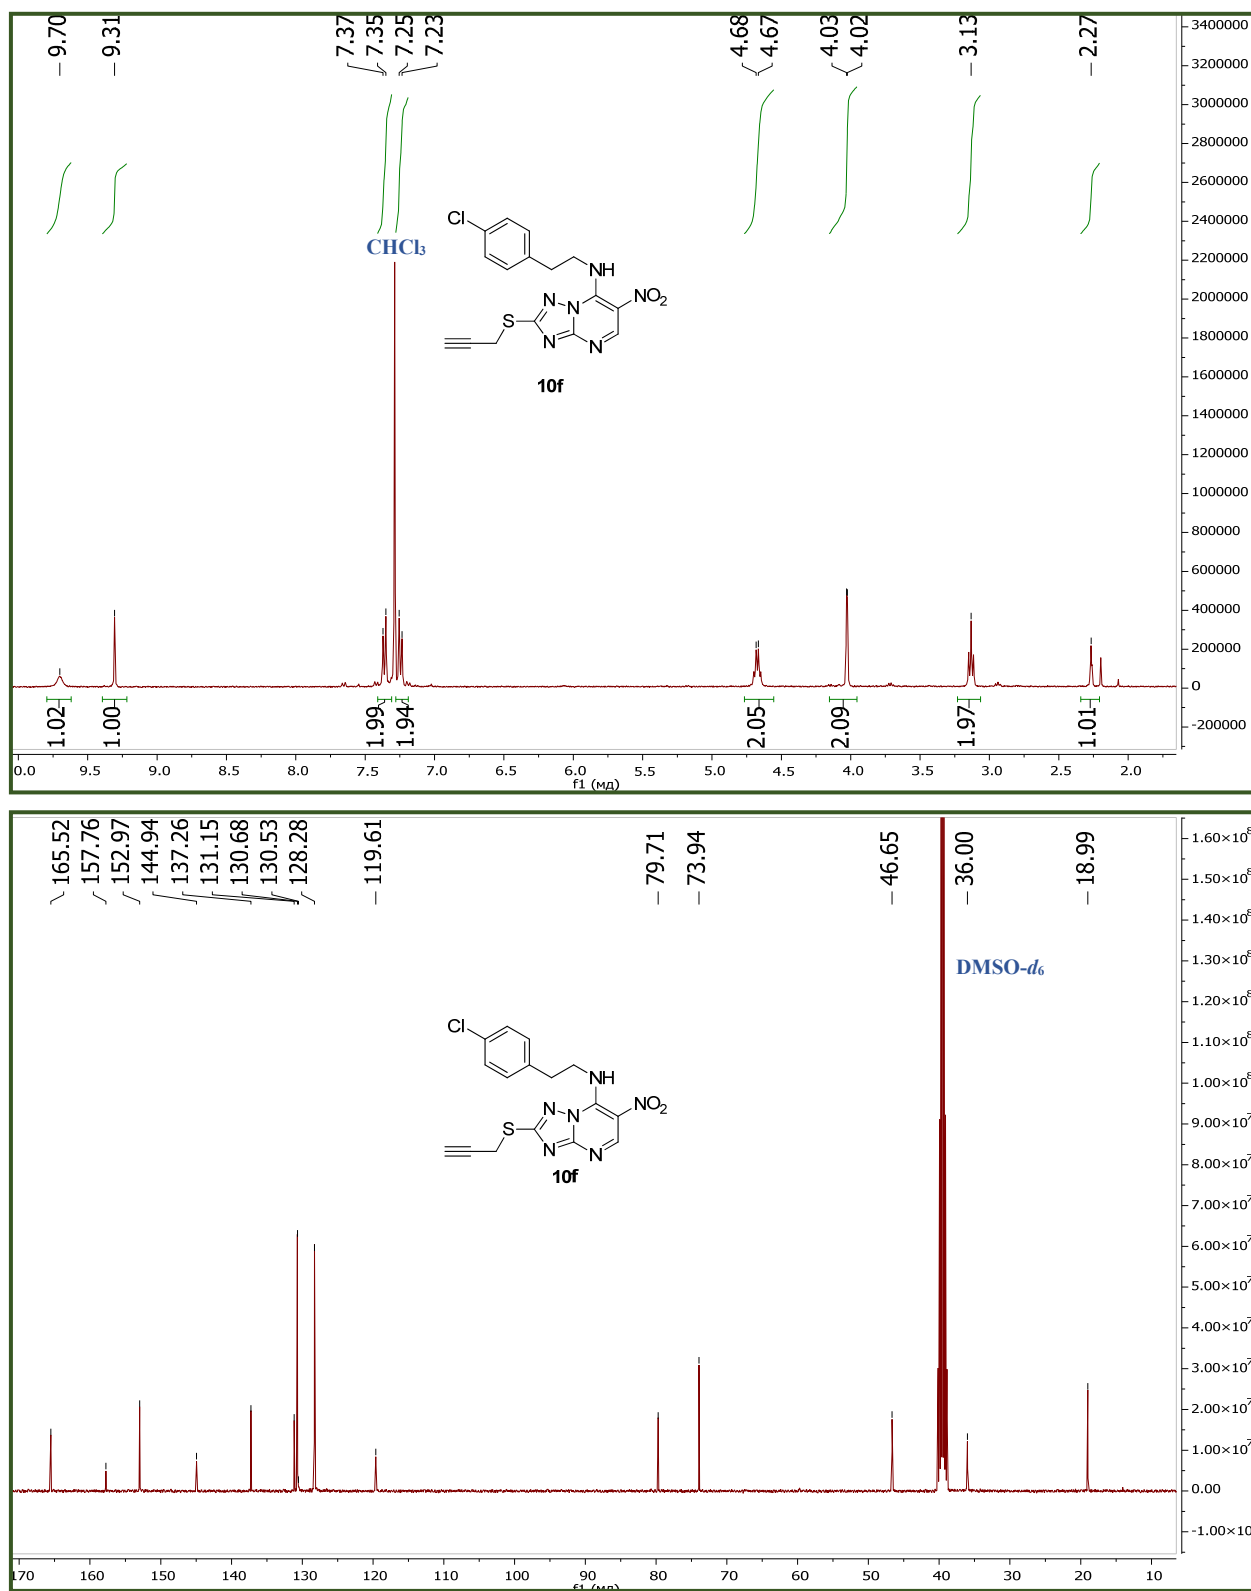

**Figure S8.** <sup>1</sup>H NMR (400 MHz, CDCl<sub>3</sub>) and <sup>13</sup>C NMR (100 MHz, DMSO-*d*<sub>6</sub>) spectra of **10f**

4-{2-[(6-Nitro-2-(prop-2-yn-1-ylsulfany)[1,2,4]triazolo[1,5-*a*]pyrimidin-7-yl)amino]ethyl}phenol (**10g**)

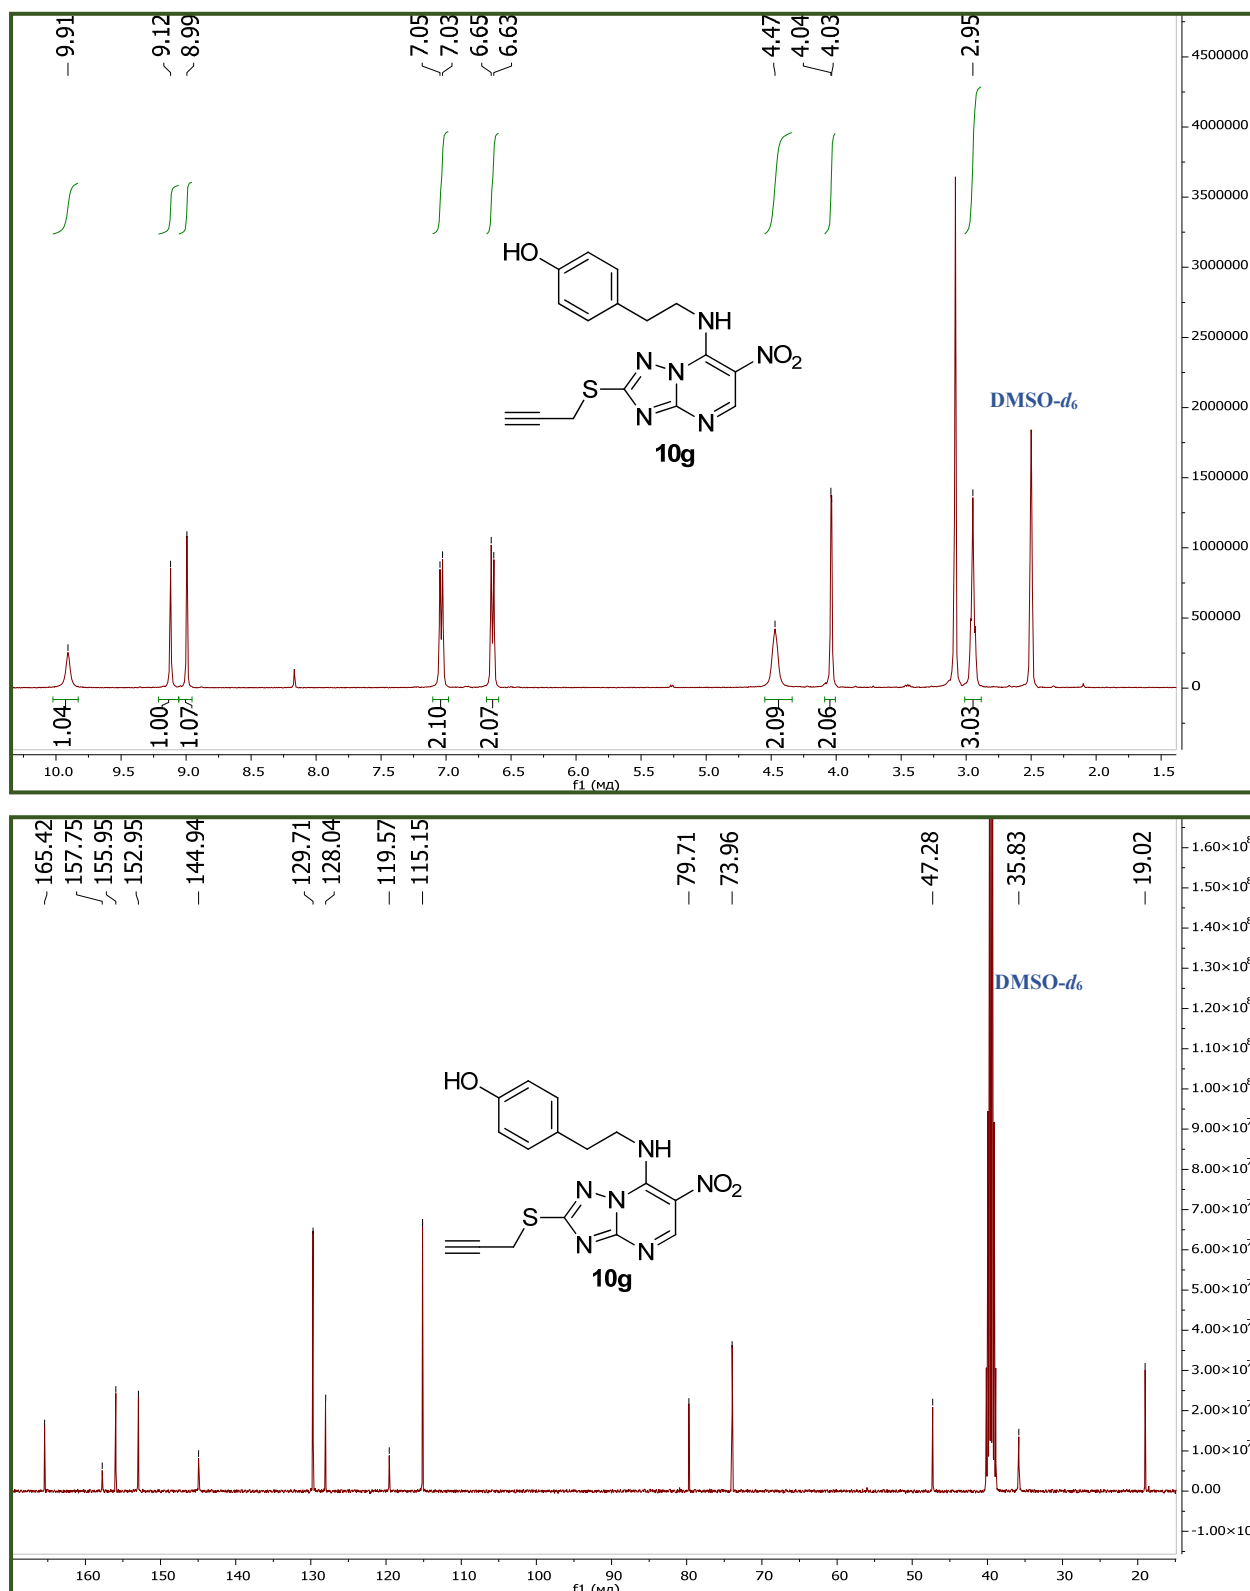

Figure S9. <sup>1</sup>H NMR (400 MHz, DMSO-*d*<sub>6</sub>) and <sup>13</sup>C NMR (100 MHz, DMSO-*d*<sub>6</sub>) spectra of **10g**

**2-(5-Nitrofur-2-yl)-5-methyl-6-nitro-1,2,4-triazolo[1,5-*a*]pyrimidin-7-one  
aminoguanidinium salt (13)**

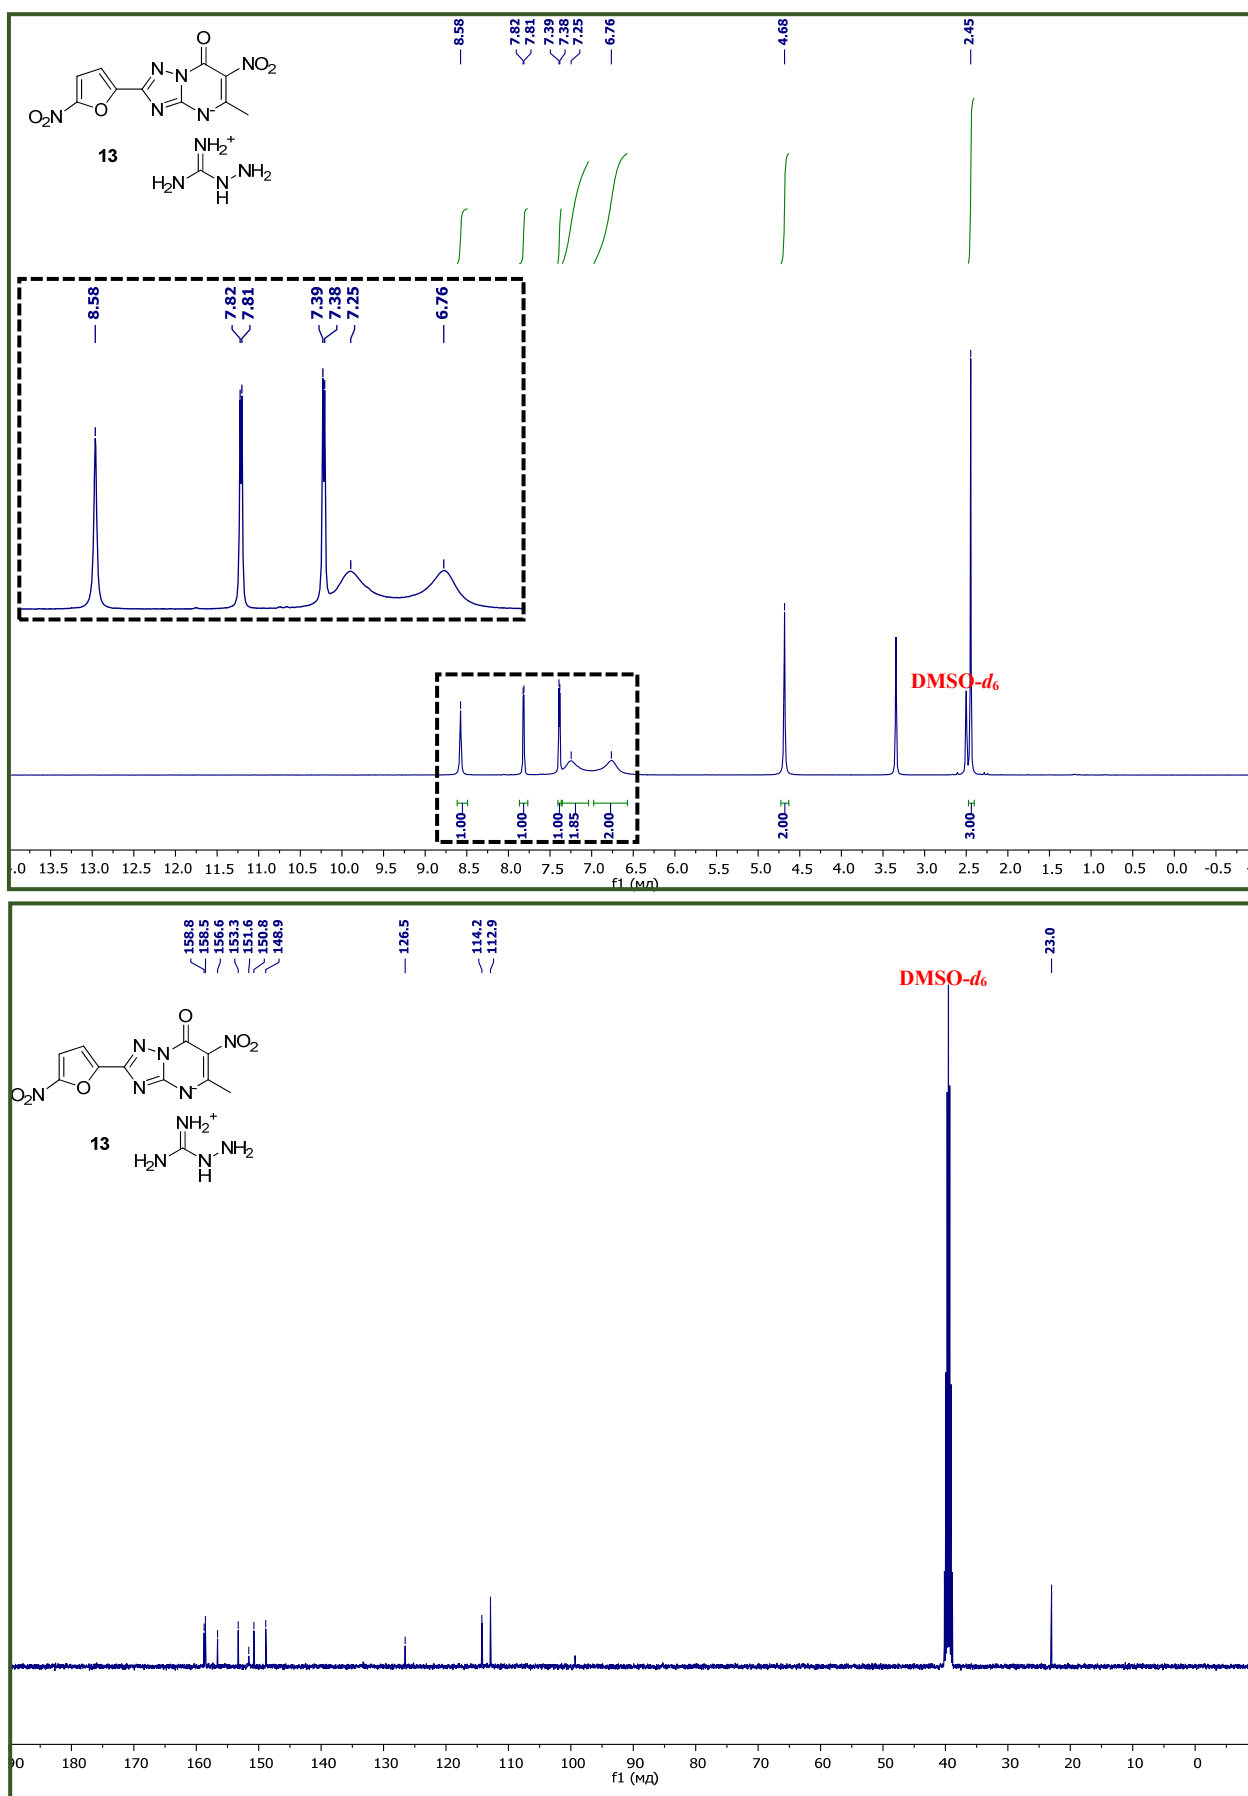

**Figure S10.** <sup>1</sup>H NMR (400 MHz, DMSO-*d*<sub>6</sub>) and <sup>13</sup>C NMR (100 MHz, DMSO-*d*<sub>6</sub>) spectra of **13**

**2-(5-Nitrofur-2-yl)-5-methyl-6-nitro-1,2,4-triazolo[1,5-*a*]pyrimidin-7-one guanidinium salt (14)**

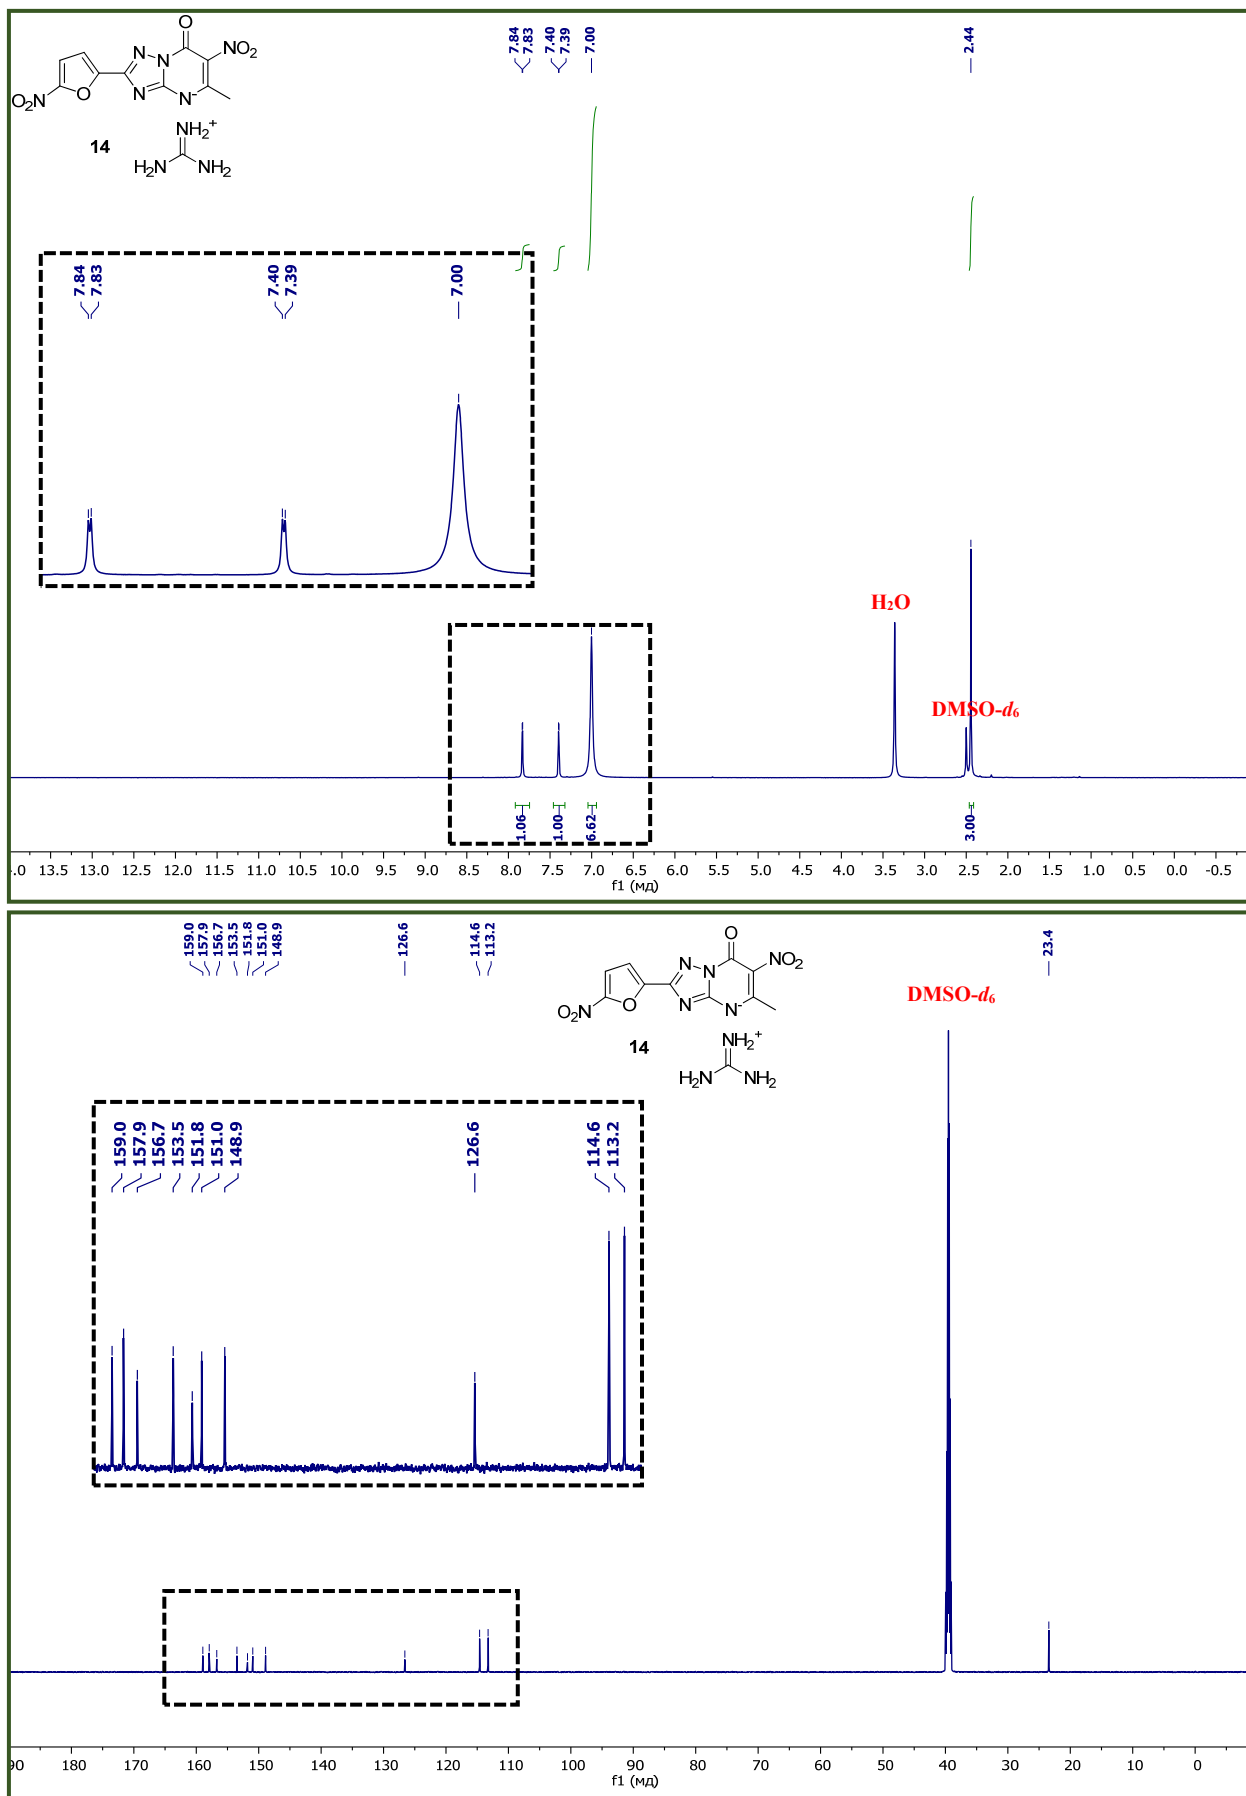

**Figure S11.** <sup>1</sup>H NMR (400 MHz, DMSO-*d*<sub>6</sub>) and <sup>13</sup>C NMR (100 MHz, DMSO-*d*<sub>6</sub>) spectra of **14**
